# Supplementary material for: Visible light photoreforming of greenhouse gases by nano Cu–Al LDH intercalated with urea-derived anions
Source: Royal Society of Chemistry journal article supplement (doi:10.1039/d3ra06190f), 2023-01-01
Supplement: d3ra06190f1.pdf [file d3ra06190f1.pdf]

## Supplementary File

### **Visible light photoreforming of Greenhouse gases by nano Cu-Al LDH intercalated with urea-derived anions**

Ayat A.-E. Sakr <sup>a,\*</sup>, Dalia R. Abd El-Hafiz <sup>b</sup>, Osama Elgabry <sup>a</sup>, Eman S. Abdullah <sup>a</sup>,  
Mohamed A. Ebiad <sup>a</sup>, Tamer Zaki <sup>b</sup>

<sup>a</sup> *Analysis & Evaluation Division, Egyptian Petroleum Research Institute, Nasr city, P.B. 11727, Cairo, Egypt*

<sup>b</sup> *Catalysis Department, Petroleum Refining Division, Egyptian Petroleum Research Institute, Nasr city, P.B. 11727, Cairo, Egypt.*

*\* Corresponding author*

*E-mail: [ayatsakr@yahoo.com](mailto:ayatsakr@yahoo.com); [ayatsakr78@gmail.com](mailto:ayatsakr78@gmail.com); [ayatsakr@epri.sci.eg](mailto:ayatsakr@epri.sci.eg)*

*ORCID ID: [0000-0003-1987-0869](https://orcid.org/0000-0003-1987-0869)*

| <b>Content</b> | <b>Page</b>                                                                                                                                                                            |     |
|----------------|----------------------------------------------------------------------------------------------------------------------------------------------------------------------------------------|-----|
| Table S1       | Previously reported synthesizes Cu-Al LDH homogenously precipitated by urea hydrolysis                                                                                                 | S3  |
| Sec. S1        | Experimental                                                                                                                                                                           | S4  |
| Sec. S2        | pH monitoring of Cu-Al LDH synthesis reaction                                                                                                                                          | S5  |
| Fig. S1        | Effect of MW power on pH changes during Cu-Al LDH synthesis reaction                                                                                                                   | S7  |
| Table S2       | Effect of MW power on the pH change during homogenous precipitation of the Cu-Al LDH materials prepared at the same conditions.                                                        | S7  |
| Fig. S2        | Effect of urea concentration on pH changes during Cu-Al LDH synthesis reaction.                                                                                                        | S8  |
| Table S3       | Effect of urea concentration on the pH change during homogenous precipitation of the Cu-Al LDH materials prepared at the same conditions.                                              | S8  |
| Fig. S3        | Effect of $M^{II}/M^{III}$ ratio on the pH change during homogenous precipitation of the Cu-Al LDH materials prepared at the same conditions.                                          | S9  |
| Table S4       | Effect of $M^{II}/M^{III}$ on the pH change during homogenous precipitation of the Cu-Al LDH materials prepared at the same conditions.                                                | S9  |
| Fig. S4        | pH Changes during the C9 synthesis reaction.                                                                                                                                           | S10 |
| Fig. S5        | C9 sample XRD pattern.                                                                                                                                                                 | S10 |
| Fig. S6        | XRD patterns of materials prepared at different MW power.                                                                                                                              | S11 |
| Fig. S7        | Effect of varying urea concentration on the FTIR spectra of the prepared samples.                                                                                                      | S12 |
| Fig. S8        | Effect of varying MW power on the FTIR spectra of the prepared samples.                                                                                                                | S13 |
| Fig. S9        | EDX analysis for C4 LDH sample                                                                                                                                                         | S14 |
| Table S5       | EDX results for C4 LDH sample as elements %                                                                                                                                            | S14 |
| Fig. S10       | DR UV-Vis spectra for samples prepared at different (a) MW power and (b) urea concentration, respectively.                                                                             | S15 |
| Sec. 3         | DR UV-Vis calculation                                                                                                                                                                  | S16 |
| Fig. S11       | Effect of MW power on the calculated energy band gaps for the Cu-Al LDH materials.                                                                                                     | S17 |
| Fig. S12       | Effect of varying urea concentration on the calculated energy band gaps for the Cu-Al LDH materials.                                                                                   | S18 |
| Fig. S13       | Effect of varying $M^{II}/M^{III}$ ratio on the calculated energy band gaps for the Cu-Al LDH materials.                                                                               | S19 |
| Fig. S14       | FE-SEM images for a) C2, b) C4, and c) C5 Cu-Al LDH materials that are prepared at different urea concentrations                                                                       | S20 |
| Fig. S15       | FE-SEM images for a) C1, b) C2, and c) C3 Cu-Al LDH materials that are prepared at different MW power.                                                                                 | S21 |
| Fig. S16       | Variation of (I) $CH_4$ and (II) $CO_2$ conversion % of catalysts prepared at different (a) MW power, (b) urea percentage, and (c) $M^{II}/M^{III}$ ratios.                            | S22 |
| Fig. S17       | Accumulative converted amount of $CH_4$ and $CO_2$ with time and corresponding formaldehyde selectivity % using the Cu-Al LDH catalysts prepared at different urea concentrations.     | S23 |
| Fig. S18       | Accumulative converted amount of $CH_4$ and $CO_2$ with time and corresponding formaldehyde selectivity % using the Cu-Al LDH catalysts prepared at different $M^{II}/M^{III}$ ratios. | S24 |
| Fig. S19       | Accumulative converted amount of $CH_4$ and $CO_2$ with time and corresponding formaldehyde selectivity % using different C4 doses.                                                    | S25 |
| Fig. S20       | Variation in both $CH_4$ and $CO_2$ percentage with time in light off experiment without catalyst                                                                                      | S26 |
| References     |                                                                                                                                                                                        | S27 |

Table S1: previously reported synthesizes Cu-Al LDH homogenously precipitated by urea hydrolysis.

| <i>Material</i>                                          | <i>Source</i>                             | <i>Reactor</i>                         | <i>Temperature</i>             | <i>Pressure</i>               | <i>Heating source</i> | <i>Application</i>                                                                                   | <i>References</i> |
|----------------------------------------------------------|-------------------------------------------|----------------------------------------|--------------------------------|-------------------------------|-----------------------|------------------------------------------------------------------------------------------------------|-------------------|
| Cu-Al LDH                                                | Cu/Al-nitrates                            | Open glass reactor                     | ~95°C for 1.5 h                | Atmospheric pressure          | MW                    | Photocatalytic greenhouse gases (CO <sub>2</sub> , CH <sub>4</sub> , and H <sub>2</sub> O) reforming | This work         |
| Cu-Al LDH/ Zn-BTC                                        | Cu/Al-nitrates                            | Teflon-lined stainless-steel autoclave | 130 °C for 8 h                 | Under hydrothermal conditions | thermal               | CO <sub>2</sub> hydrogenation to methanol                                                            | 1                 |
| Cu-Al LDH                                                | Cu/Al-nitrates, dimethyl sulfoxide (DMSO) | Teflon-lined stainless-steel autoclave | 110 °C for 12 h                | Under hydrothermal conditions | thermal               | methyl orange degradation                                                                            | 2                 |
| Cu-Al LDH/PVDF composite                                 | Cu/Al-nitrates                            | Teflon-lined stainless-steel autoclave | 100 °C for 6 h                 | Under hydrothermal conditions | thermal               | Dye removal from water                                                                               | 3                 |
| Modified Cu-Al LDH                                       | Cu/Al-nitrates, DMSO as the solvent       | Teflon-lined stainless-steel autoclave | 110 °C for 12 h.               | Under hydrothermal conditions | thermal               | nano-scale drug delivery system                                                                      | 4                 |
| Cu-Al LDH/g-C <sub>3</sub> N <sub>4</sub> nanocomposites | Cu/Al-nitrates                            | Teflon-lined stainless-steel autoclave | 130 °C for 4 h                 | Under hydrothermal conditions | thermal               | supercapacitors                                                                                      | 5                 |
| polymers-decorated Cu-Al LDH                             | Cu/Al-nitrates, DMSO as the solvent       | Teflon-lined stainless-steel autoclave | 110 °C for 12 h.               | Under hydrothermal conditions | thermal               | Photothermal therapy                                                                                 | 6                 |
| diatomite/Cu-Al LDH hybrid composite                     | Cu/Al-nitrates                            | Teflon-lined stainless-steel autoclave | 110 °C for 18 h                | Under hydrothermal conditions | thermal               | polyethylene degradation                                                                             | 7                 |
| Cu-Al LDH microsphere                                    | Cu/Al-sulphates                           | --                                     | 100 °C for 24 h under stirring | --                            | Thermal               | Non-enzymatic glucose sensor                                                                         | 8                 |
| Cu-Al LDH intercalated with molecular metallo-porphyrins | Cu/Al-nitrates                            | Teflon-lined stainless-steel autoclave | 130 °C for 8 h                 | Under hydrothermal conditions | thermal               | CO <sub>2</sub> hydrogenation                                                                        | 9                 |
| Metal oxides derived Cu-Al LDH                           | Cu/Al-nitrates                            | Teflon-lined stainless-steel autoclave | 110 °C for 12 h                | Under hydrothermal conditions | thermal               | Electrocatalytic nitrate conversion                                                                  | 10                |
| Hierarchical Cu-Al LDH/carbon fiber composites           | Cu/Al-nitrates                            | Teflon-lined stainless-steel autoclave | 110 °C for 12 h                | Under hydrothermal conditions | thermal               | Degradation of ammonia nitrogen from wastewater.                                                     | 11                |

## **Sec. S1: Experimental**

In more detail, regarding the quality and purity of the raw materials, for the synthesis of C4 material (as an example), in 500 mL of deionized water, a mixture of 9.15 g of copper nitrate, 4.78 g of aluminium nitrate, and 21.12 g of urea was prepared. The mixture is then subjected to microwave irradiation (270 watts) under continuous stirring for 90 minutes. A precipitate was formed and then treated as mentioned in Section 2.1.

## Sec. S2

### *pH monitoring of Cu-Al LDH synthesis reaction*

Several pH changes are observed during the synthesis reaction as a result of urea hydrolysis and metal precursor precipitation (Figures (S1-S3) and Tables (S2-S4)). Microwave irradiation is a green source of energy that produces fast and uniform heating. Using MW in this type of synthesis reaction provides less energy consumption and reaction time and results in the formation of nearly homogeneous particle morphology<sup>12,13</sup>. In addition, MW irradiation breaks down the formed urea-metal complex, producing metal hydroxide precipitates<sup>14</sup>. MW enhances the decomposition of urea, which consequently increases the supersaturation of the solution, which leads to the spontaneous increase of the solution pH. The extent of supersaturation is affected mainly by the urea concentration. It is responsible for the formation of nuclei and their growth into final particles<sup>15</sup>. Figures S1–S3 represent the pH changes as a function of time.

Regarding the pH changes during the LDH synthesis reaction, different regions are observed:

- 1- At the initial reaction stage, the concentrations of the positive species (metal cations and H<sup>+</sup> from water dissociation) are rather high. Region I is characterized by a decrease in the pH value. This may be due to the high consumption rate of the released OH anions from urea hydrolysis by the solution-positive species<sup>16,17</sup>.
- 2- The sharp increase in pH (II and IV) regions may be due to the release of excess OH ions in the solution due to the urea hydrolysis process<sup>17,18</sup>.
- 3- The plateau regions (III and IV) could be due to the successive metal hydroxide formations giving rise to the formation of positively charged layers<sup>15,18,19</sup>. Furthermore, the different plateau regions may indicate the intercalation of different anionic groups within the layered structures<sup>20</sup>.

- 4- A colloidal suspension is observed after the first plateau at  $\text{pH} > 4$  due to the LDH primary particles<sup>18</sup>. With further increases in  $\text{pH}$ , particles aggregate to form a precipitate<sup>17</sup>.

Figure S1 and Table S1 represent the effect of MW power on Cu-Al LDH materials prepared at the same periods, metals, and urea concentrations. As the MW power increases, the reaction rate represented during the  $\text{pH}$  change regions is accelerated, and the final  $\text{pH}$  values are increased.

The effect of urea concentration on the  $\text{pH}$  changes of the Cu-Al LDH synthesis (Figure S2 and Table S3) indicates that the precipitation reaction rate increases as the urea concentration increases<sup>19</sup>. For low urea concentrations (C6 and C7), the final  $\text{pH}$  values were low, and the precipitates obtained were very poor. Moreover, the final  $\text{pH}$  of the C9 (Figure S4) sample was 3.39, and the resulting ppt was too low under the synthesis conditions. This sample will not be considered for further investigation in this study.

Regarding the effect of the  $\text{M}^{\text{II}}/\text{M}^{\text{III}}$  ratio (Figure S3 and Table S3), the final  $\text{pH}$  increases as the metal ratio increases. This may be due to the high charge density of the  $\text{M}^{\text{III}}$  ions, which consume a higher amount of hydroxide ions. Thus, for samples prepared at the same time and with the same urea concentration, a lower final  $\text{pH}$  is observed for high  $\text{M}^{\text{III}}$  concentrations.

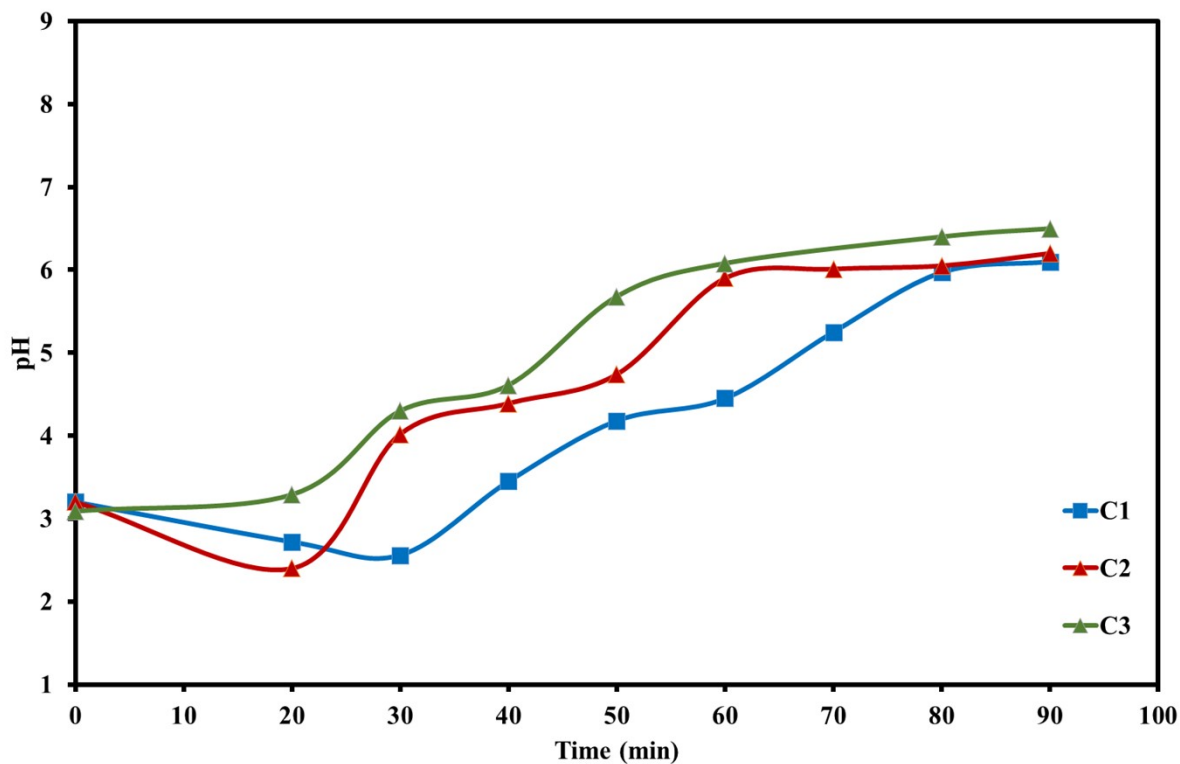

Fig. S1: Effect of MW power on pH changes during Cu-Al LDH synthesis reaction.

Table S2: Effect of MW power on the pH change during homogenous precipitation of the Cu-Al LDH materials prepared at the same conditions.

| Material | Region (I)<br>(gradual decrease) | Region (II)<br>(sharp increase) | Region (III)<br>(Plateau) | Region (IV)<br>(sharp increase) | Region (V)<br>(Plateau) | Final pH |
|----------|----------------------------------|---------------------------------|---------------------------|---------------------------------|-------------------------|----------|
| C1       | 3.2 – 2.56                       | 2.56 – 4.18                     | 4.18 – 4.45               | 4.45-6.05                       | 6.05-6.1                | 6.1      |
| C2       | 3.45 – 2.4                       | 2.4 – 4.39                      | 4.39-4.74                 | • 4.74-5.9<br>• 4.61-5.68       | 5.9-6.2                 | 6.2      |
| C3       | 3.09 – 3.29                      | 2.66 – 4.3                      | 4.3-4.61                  | 5.68-6.48<br>(slow increase)    | 6.48-6.5                | 6.5      |

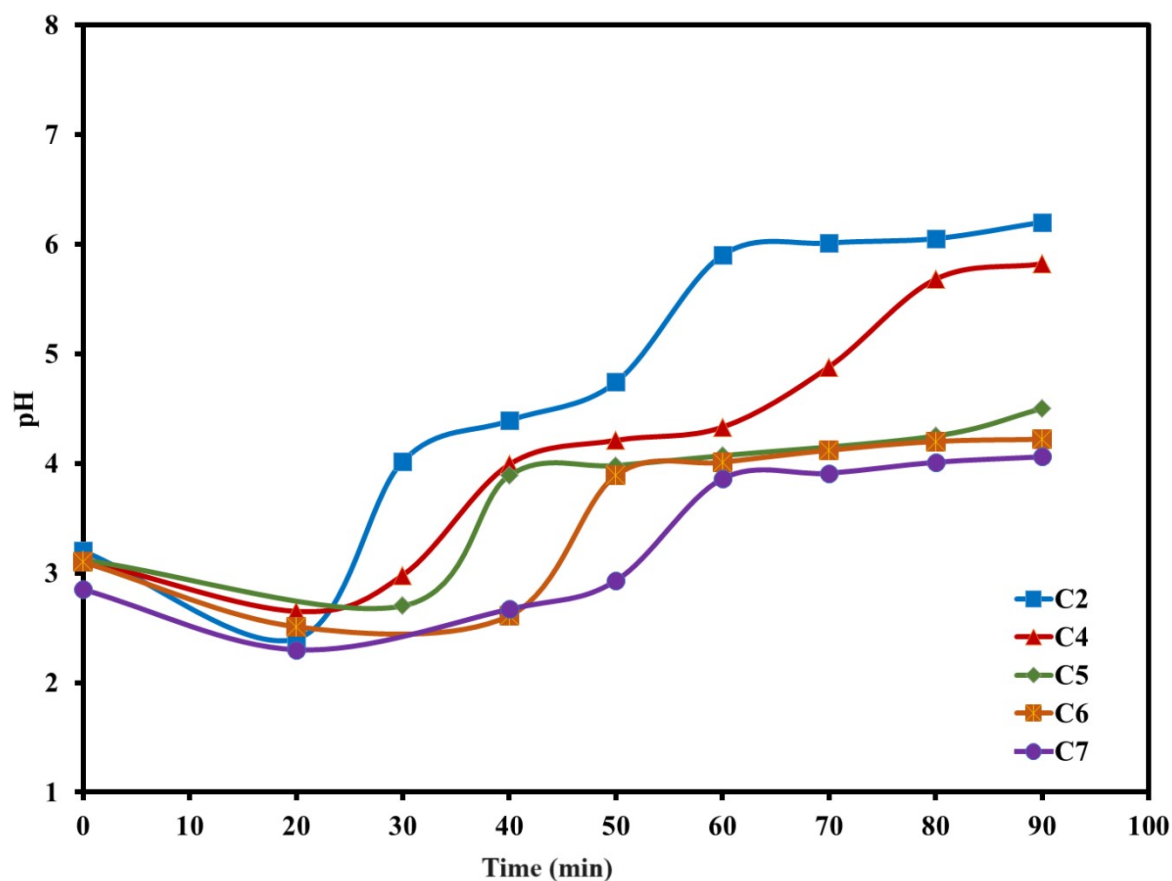

Fig. S2: Effect of urea concentration on pH changes during Cu-Al LDH synthesis reaction.

Table S3: Effect of urea concentration on the pH change during homogenous precipitation of the Cu-Al LDH materials prepared at the same conditions.

| Material | Region (I)<br>(gradual decrease) | Region (I-1)<br>(plateau) | Region (II)<br>(sharp increase) | Region (III)<br>(Plateau) | Region (IV)<br>(sharp increase) | Region (V)<br>(Plateau) | Final pH |
|----------|----------------------------------|---------------------------|---------------------------------|---------------------------|---------------------------------|-------------------------|----------|
| C2       | 3.45 – 2.4                       | --                        | 2.4 – 4.39                      | 4.39-4.74                 | 4.74-5.9                        | 5.9-6.2                 | 6.2      |
| C4       | 3.12-2.65                        | --                        | 2.65-3.99                       | 3.99-4.33                 | 4.33-6.68                       | 5.68-5.82               | 5.82     |
| C5       | 3.12-2.7                         | --                        | 2.7-3.89                        | 3.89-4.25                 | 4.25-4.5                        | --                      | 4.5      |
| C6       | 3.10-2.51                        | 2.51-2.61                 | 2.61-3.89                       | 3.89-4.22                 | --                              | --                      | 4.22     |
| C7       | 2.85-2.3                         | 2.3-2.93                  | 2.93-3.86                       | 3.86-4.06                 | --                              | --                      | 4.06     |



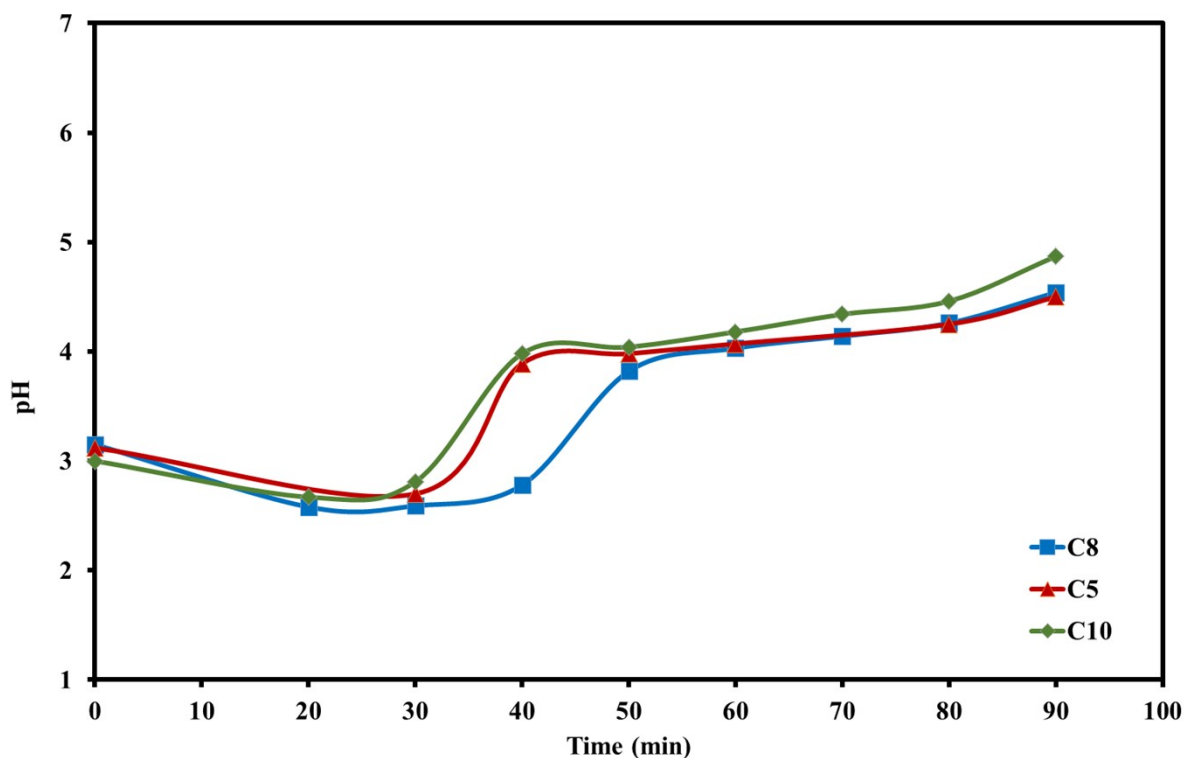

Fig. S3: Effect of MII/MIII ratio on the pH change during homogenous precipitation of the Cu-Al LDH materials prepared at the same conditions.

Table S4: Effect of MII/MIII on the pH change during homogenous precipitation of the Cu-Al LDH materials prepared at the same conditions.

| Material | Region (I)<br>(gradual decrease) | Region (I-1)<br>(plateau) | Region (II)<br>(sharp increase) | Region (III)<br>(Plateau) | Region (IV)<br>(sharp increase) | Region (V)<br>(Plateau) | Final pH |
|----------|----------------------------------|---------------------------|---------------------------------|---------------------------|---------------------------------|-------------------------|----------|
| C8       | 3.15-2.58                        | 2.58-2.78                 | 2.78-3.82                       | 3.82-4.26                 | 4.26-4.54                       | --                      | 4.54     |
| C5       | 3.12-2.7                         | --                        | 2.7-3.89                        | 3.89-4.25                 | 4.25-4.5                        | --                      | 4.5      |
| C10      | 3.0-2.81                         | --                        | 2.81-3.98                       | 3.98-4.46                 | 4.46-4.8                        | --                      | 4.87     |

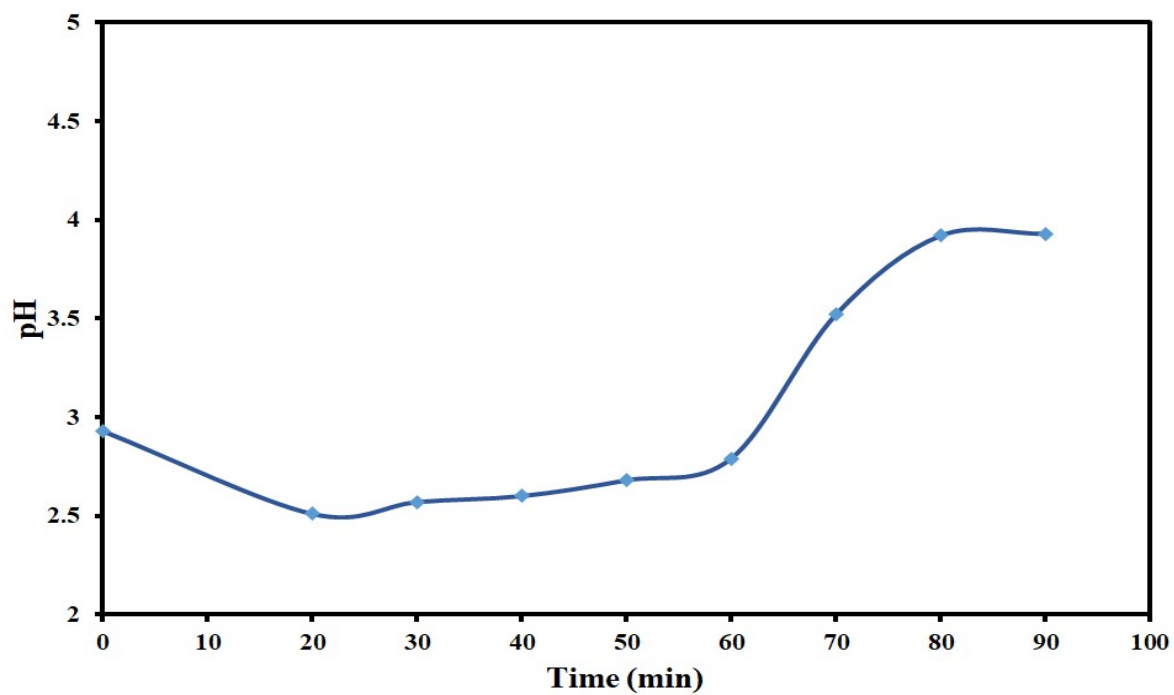

Fig. S4: pH Changes during the C9 synthesis reaction.

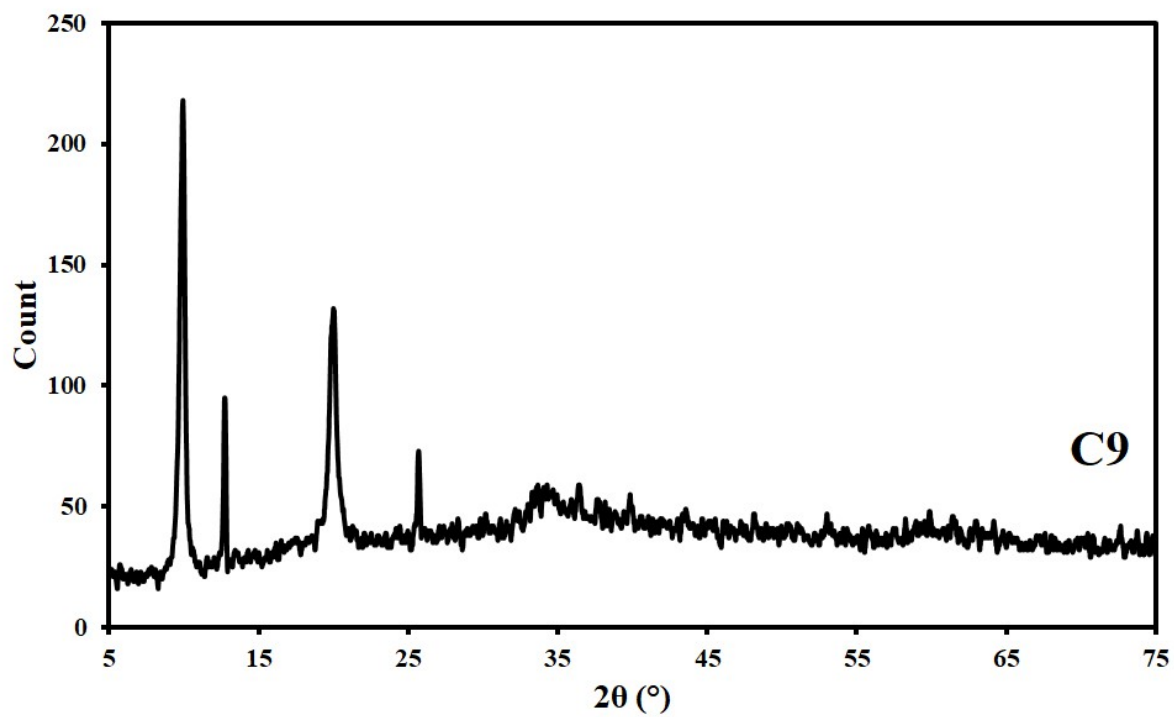

Fig. S5: C9 sample XRD pattern.

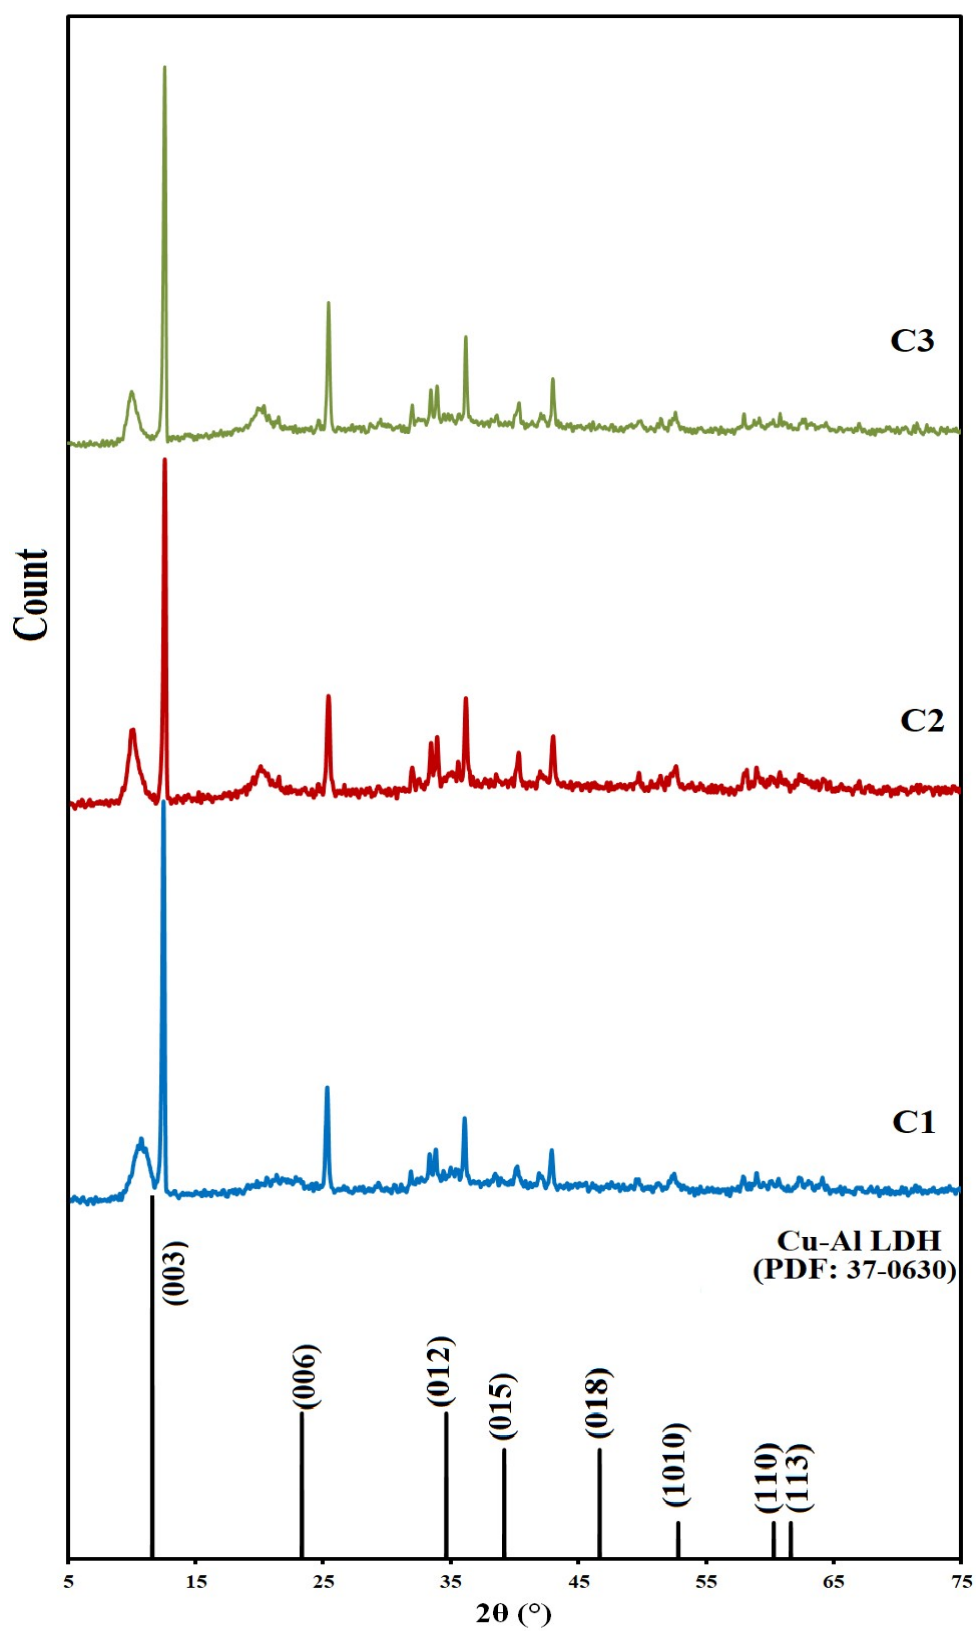

Fig. S6: XRD patterns of materials prepared at different MW power.

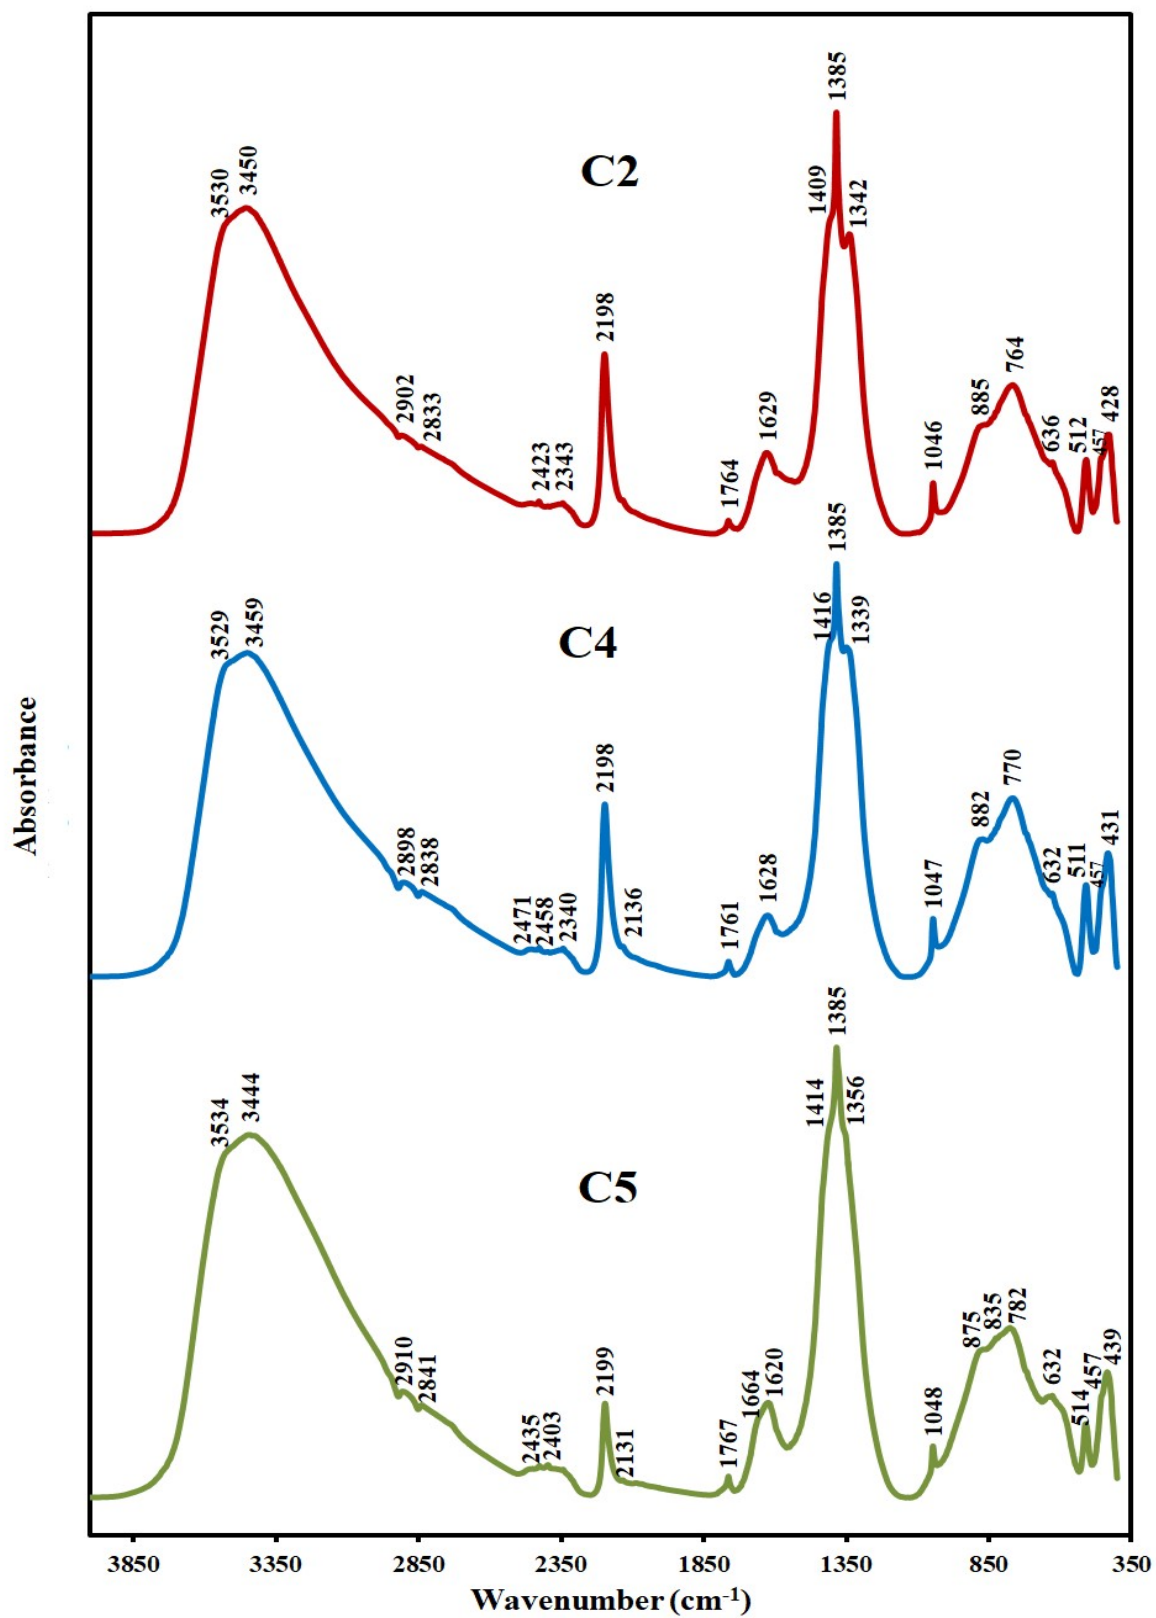

Fig. S7: Effect of varying urea concentration on the FTIR spectra of the prepared samples.

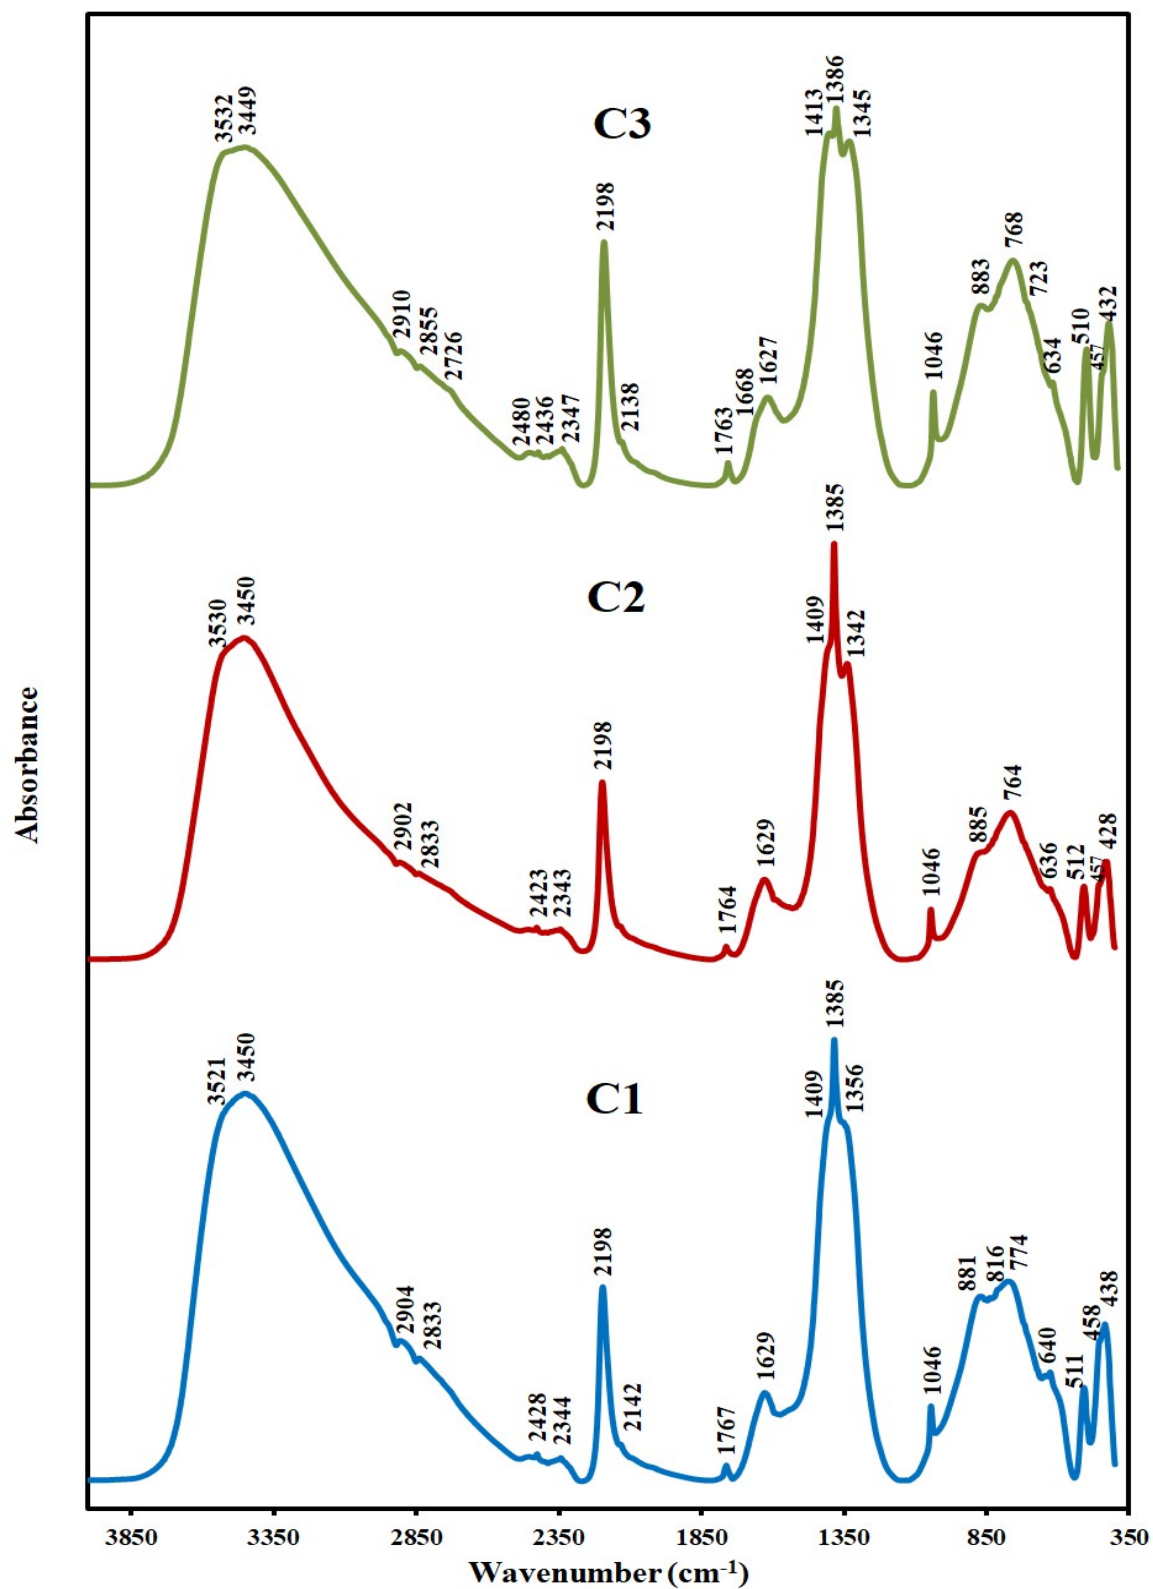

Fig. S8: Effect of varying MW power on the FTIR spectra of the prepared samples.

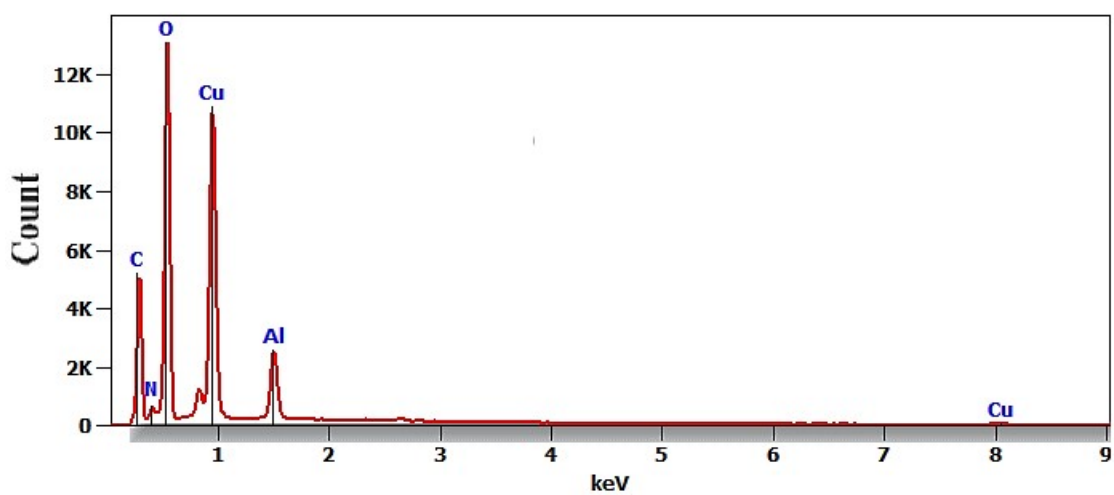

Fig. S9 : EDX analysis for C4 LDH sample.

Table S5 : EDX results for C4 LDH sample as elements %

| <i>Element</i> | <i>Atom %</i> |
|----------------|---------------|
| <b>C</b>       | 19.37         |
| <b>N</b>       | 4.32          |
| <b>O</b>       | 49.05         |
| <b>Al</b>      | 6.15          |
| <b>Cu</b>      | 21.11         |

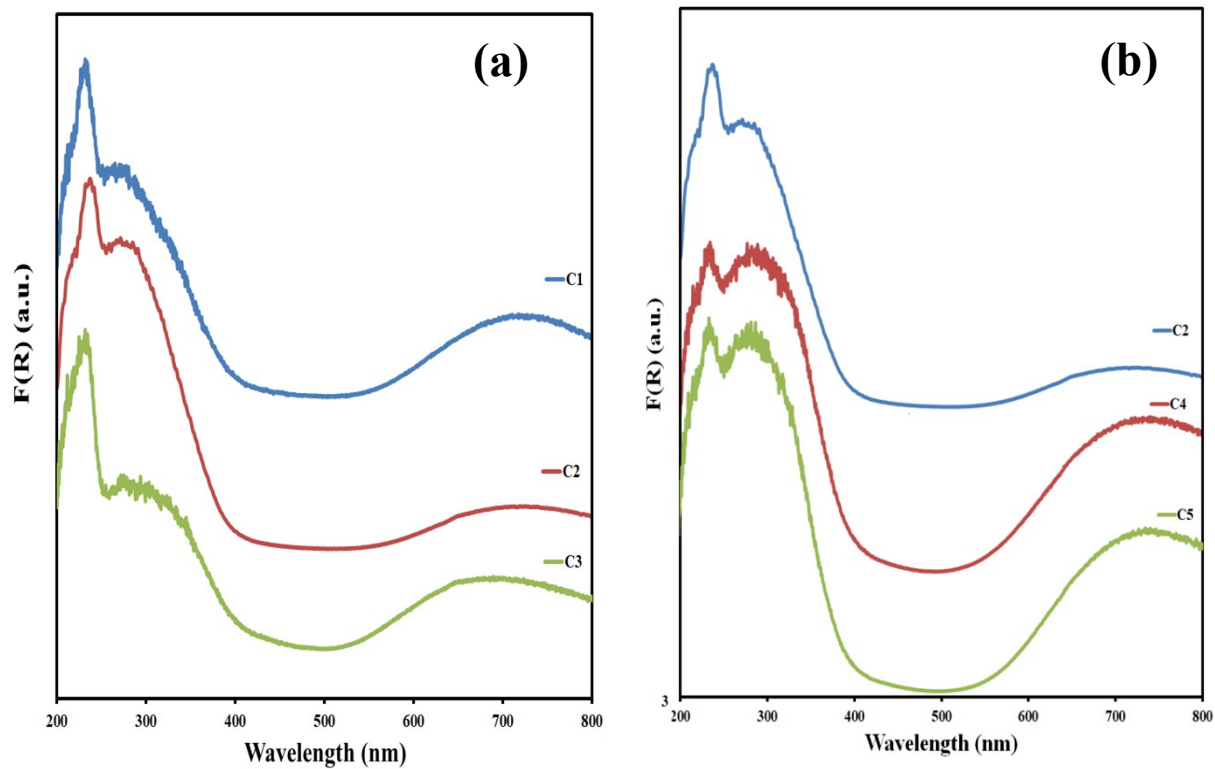

Fig. S10: DR UV-Vis spectra for samples prepared at different (a) MW power and (b) urea concentration, respectively.

### Sec.3

#### DR UV-Vis calculation

The energy band gap ( $E_g$ ) can be estimated using the Tauc method (which is applied to amorphous and crystalline nanomaterials) as follows:

$$(\alpha h\nu)^{1/n} = A(h\nu - E_g) \quad (2)$$

where  $A$  is the proportionality constant and  $h\nu$  is the photon energy (eV). The value of ( $n$ ) determines the type of semiconductor optical transition, where  $n=1/2$  and  $2$  for direct or indirect transition, respectively <sup>21</sup>.

$$E_g = h\nu = h\frac{C}{\lambda} = \frac{1240}{\lambda}(nm) \quad (3)$$

where  $h$  is the Plank constant ( $4.136 \ 1015 \text{ eV S}^{-1}$ ),  $\nu$  is the light frequency  $C$  is the speed of light, and  $\lambda$  is the light wavelength (nm).  $E_g$  (eV) is calculated from the extrapolation of the linear proportion of the plot of  $(\alpha h\nu)^{1/n}$  vs.  $h\nu$  <sup>21-23</sup>.



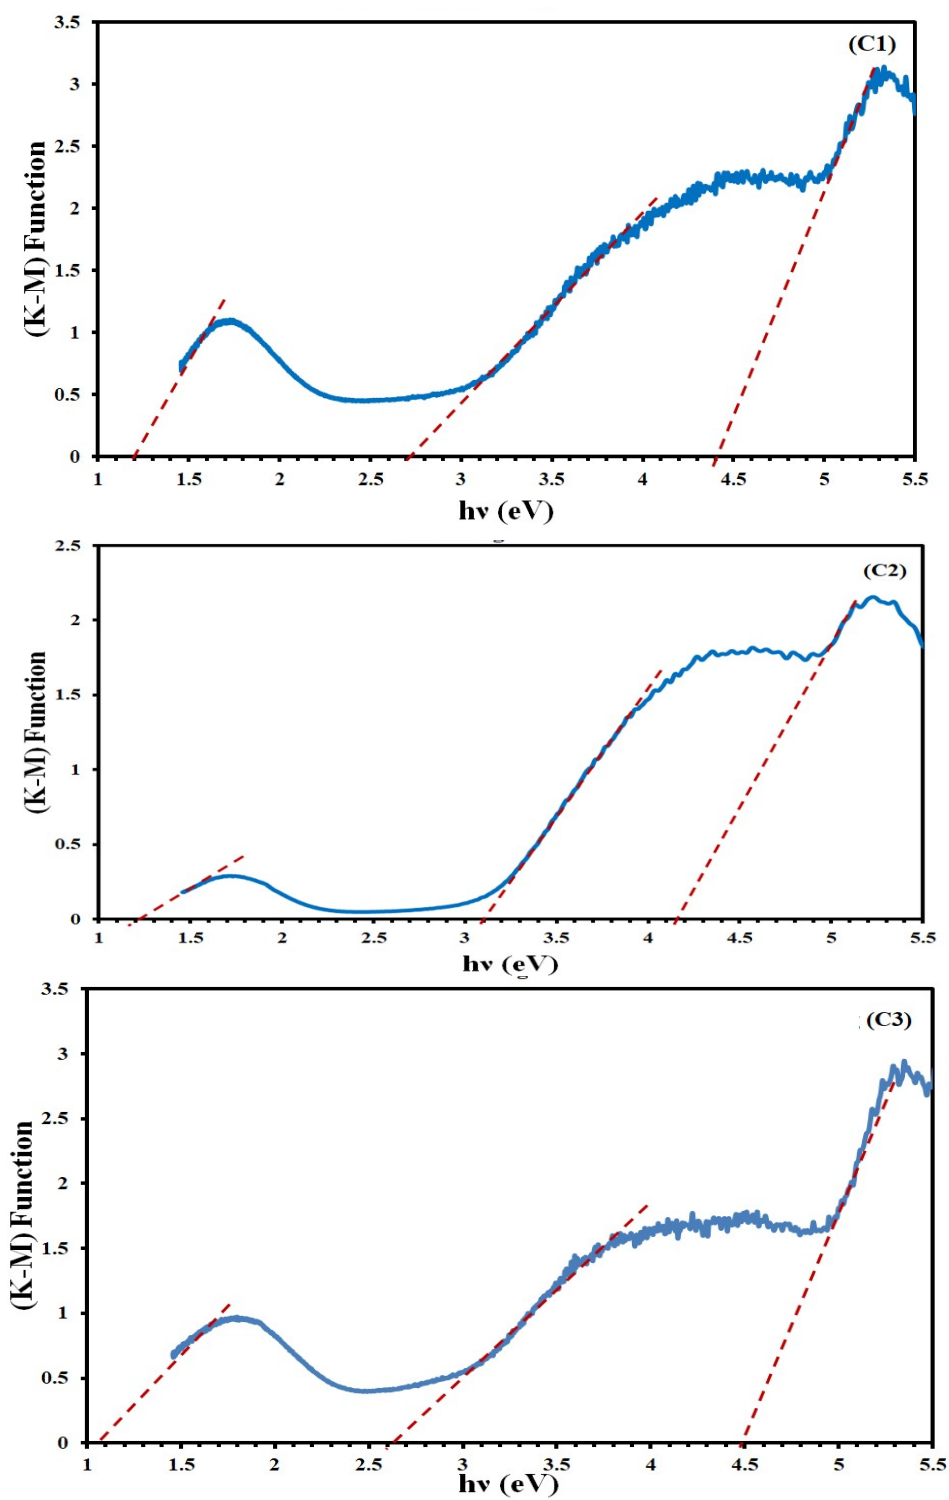

Fig. S11: Effect of MW power on the calculated energy band gaps for the Cu-Al LDH materials.

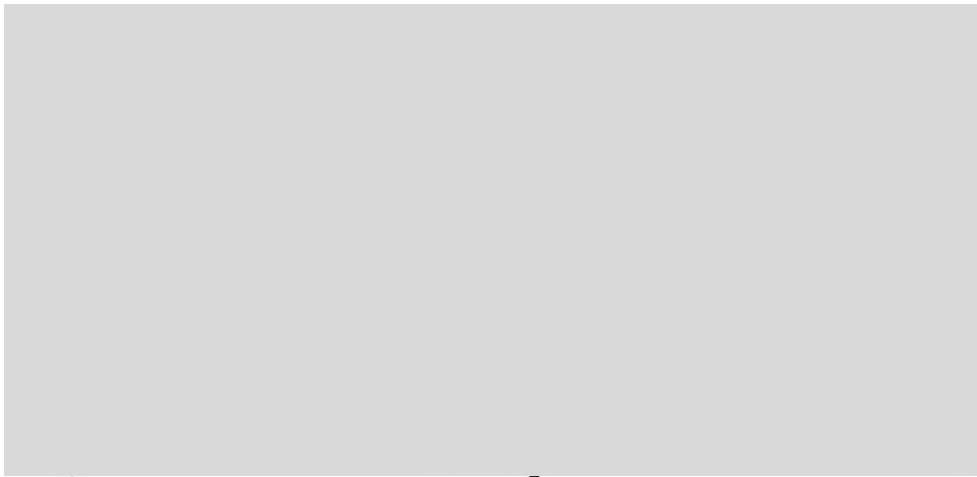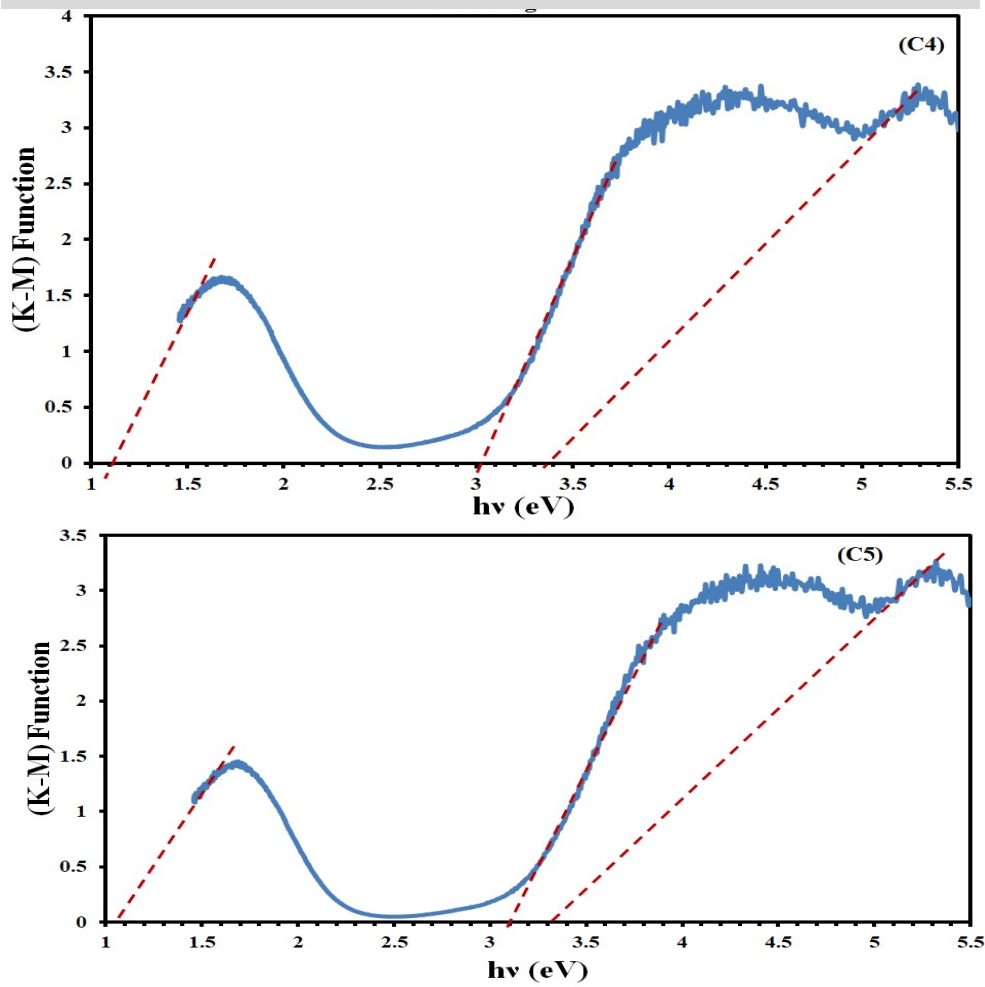

Fig. S12: Effect of varying urea concentration on the calculated energy band gaps for the Cu-Al LDH materials.

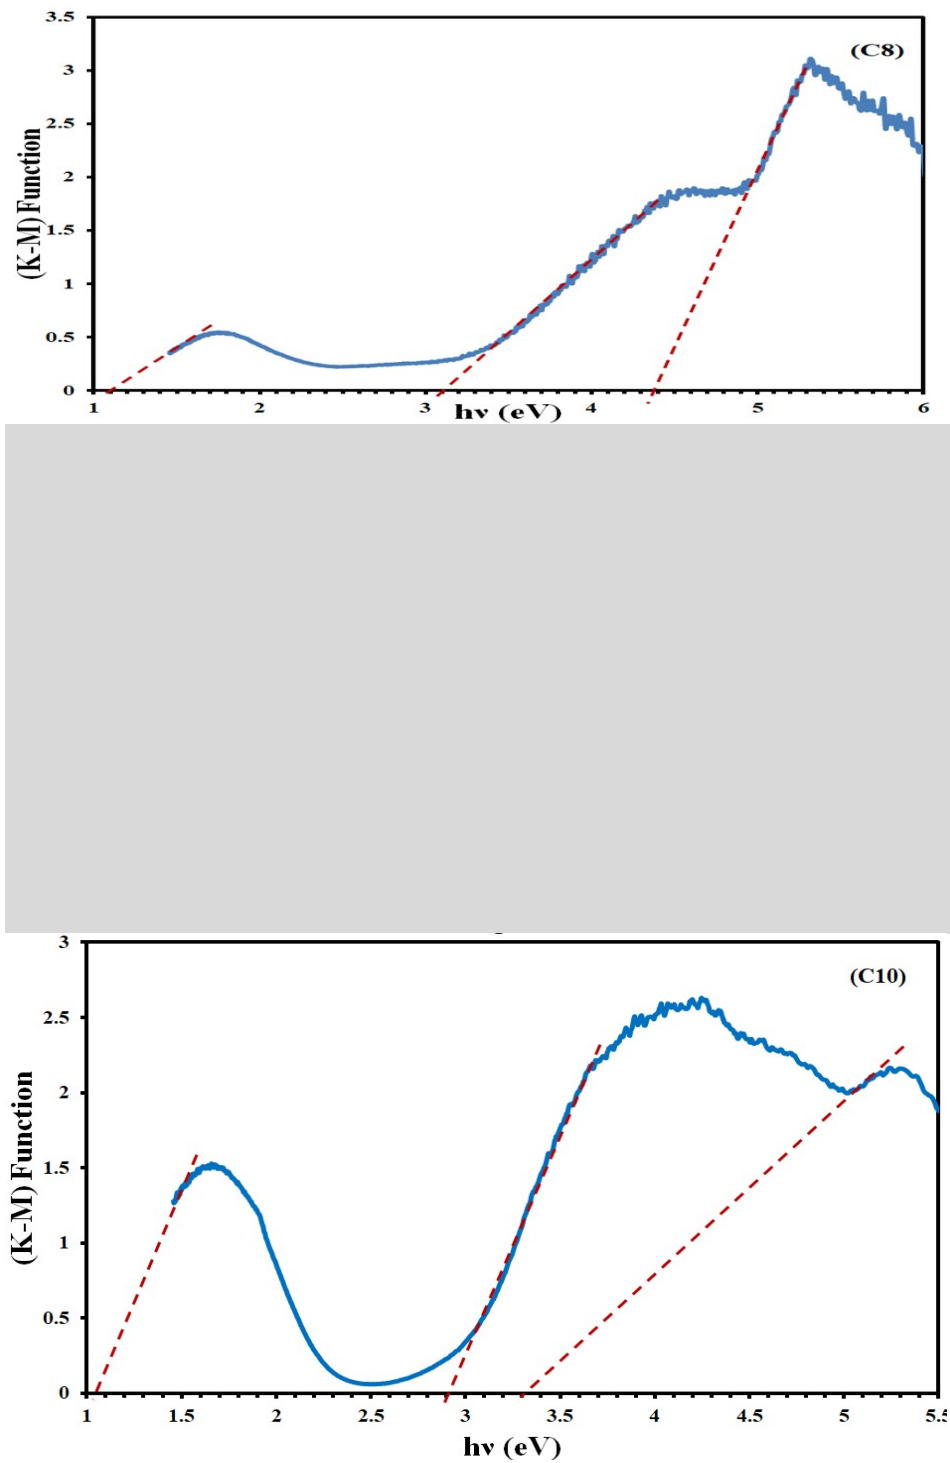

Fig. S13: Effect of varying  $M^{II}/M^{III}$  ratio on the calculated energy band gaps for the Cu-Al LDH materials.

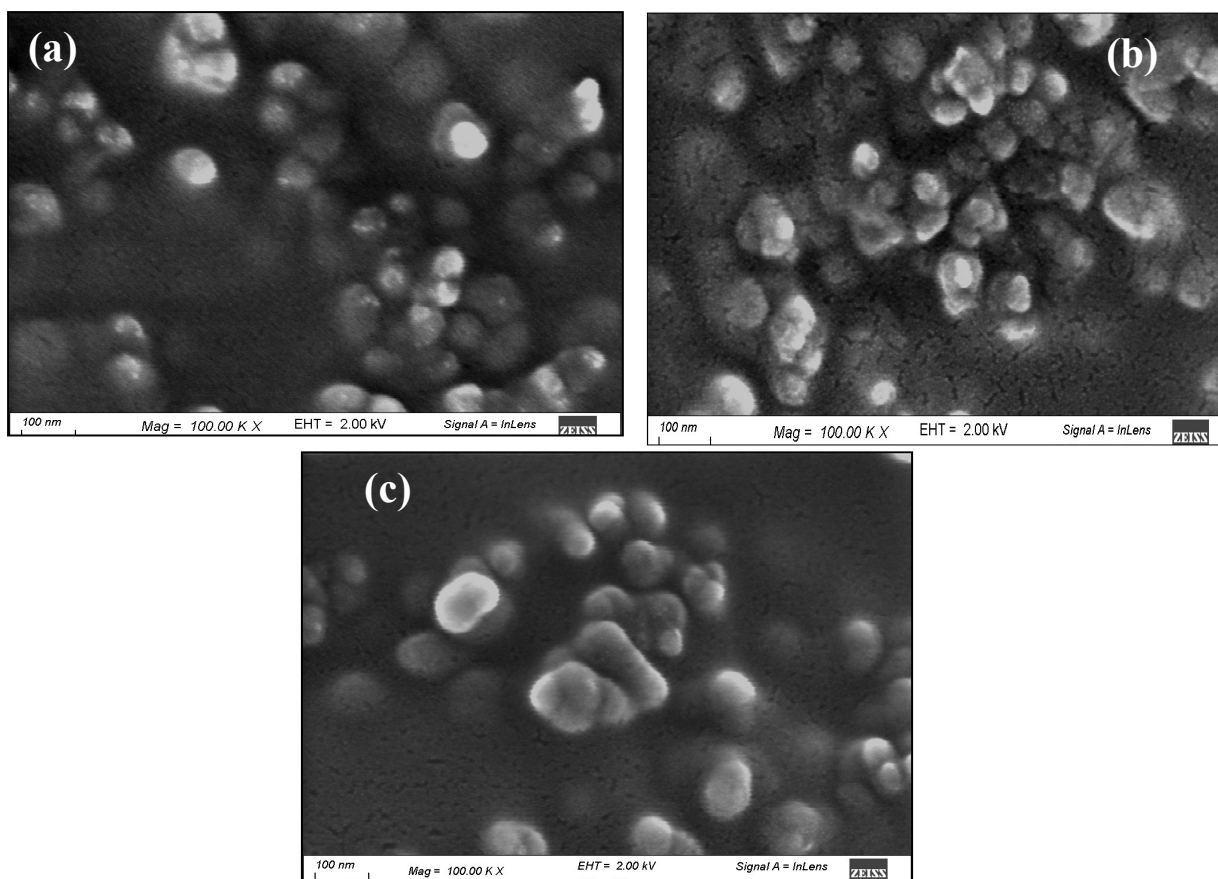

Fig. S14: FE-SEM images for a) C2, b) C4, and c) C5 Cu-Al LDH materials that are prepared at different urea concentrations.

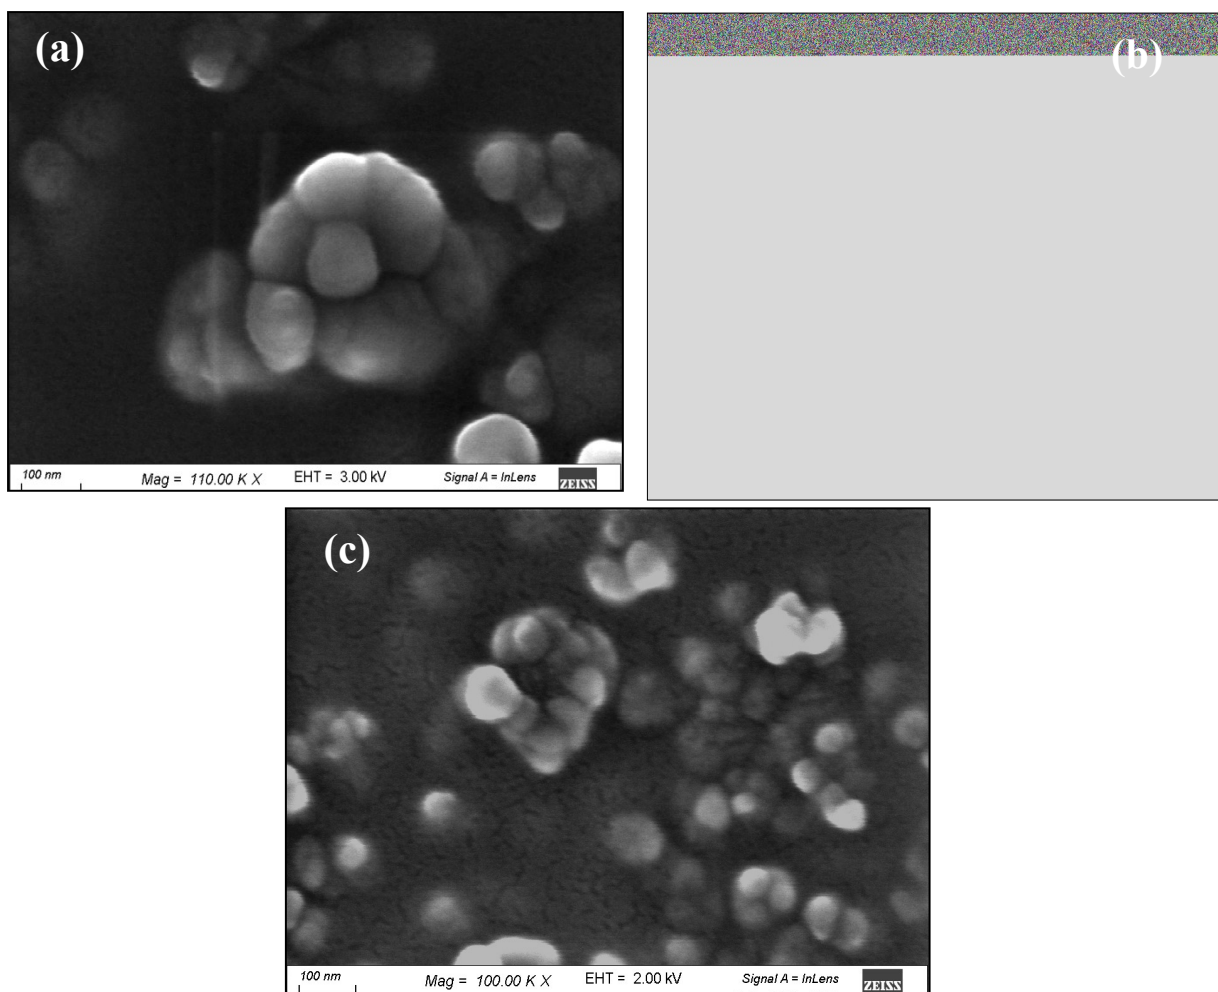

Fig. S15: FE-SEM images for a) C1, b) C2, and c) C3 Cu-Al LDH materials that are prepared at different MW power.

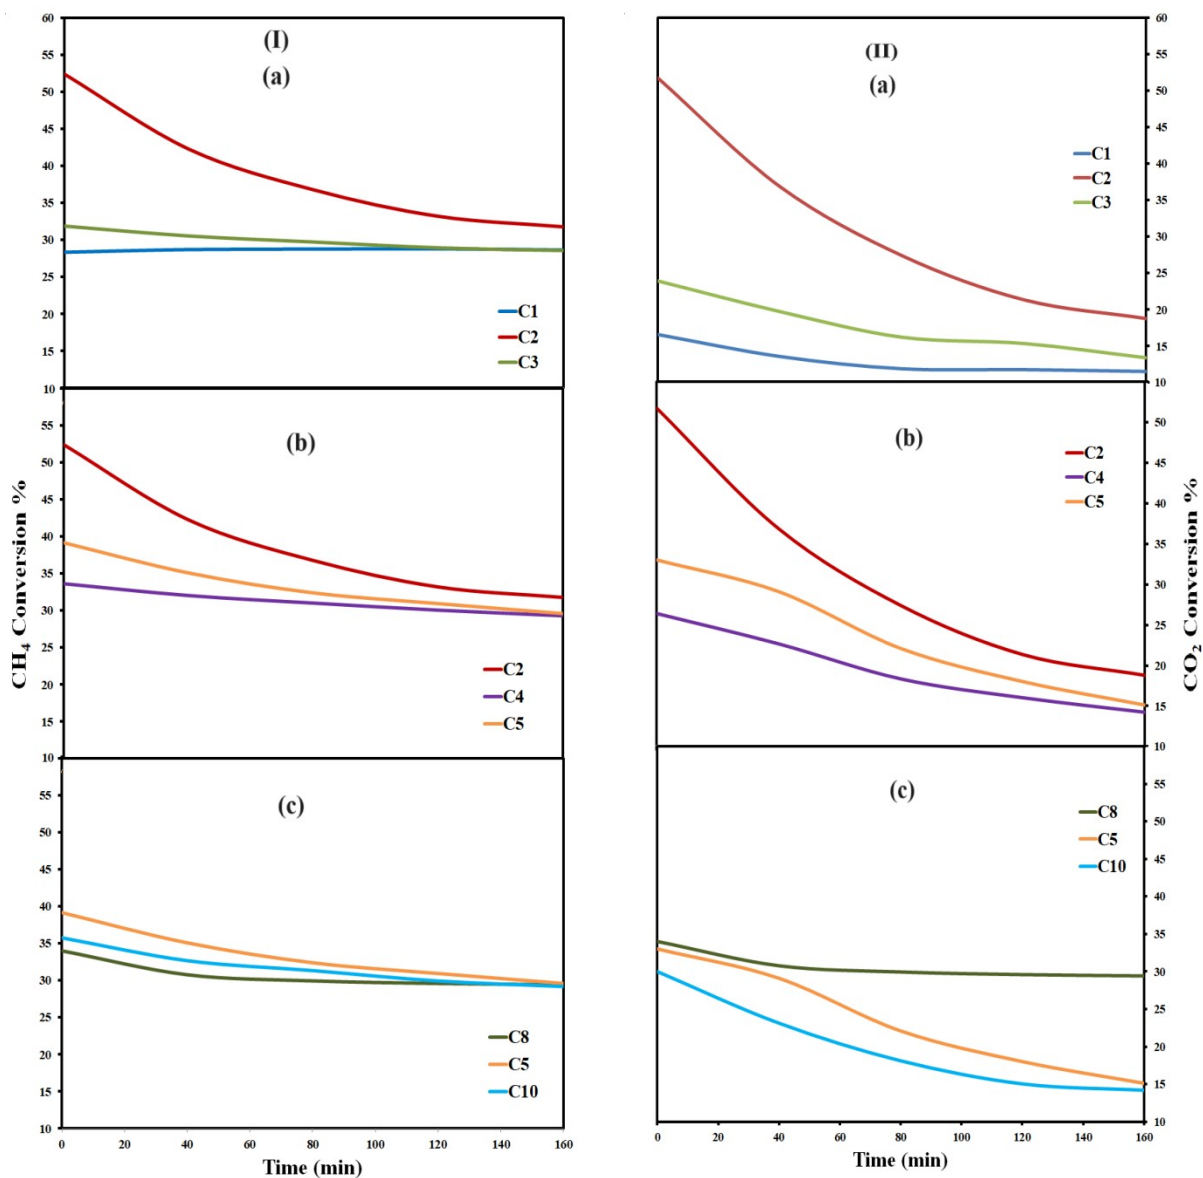

Fig. S16: Variation of (I) CH<sub>4</sub> and (II) CO<sub>2</sub> conversion % of catalysts prepared at different (a) MW power, (b) urea presentage, and (c) M<sup>II</sup>/M<sup>III</sup> ratios.

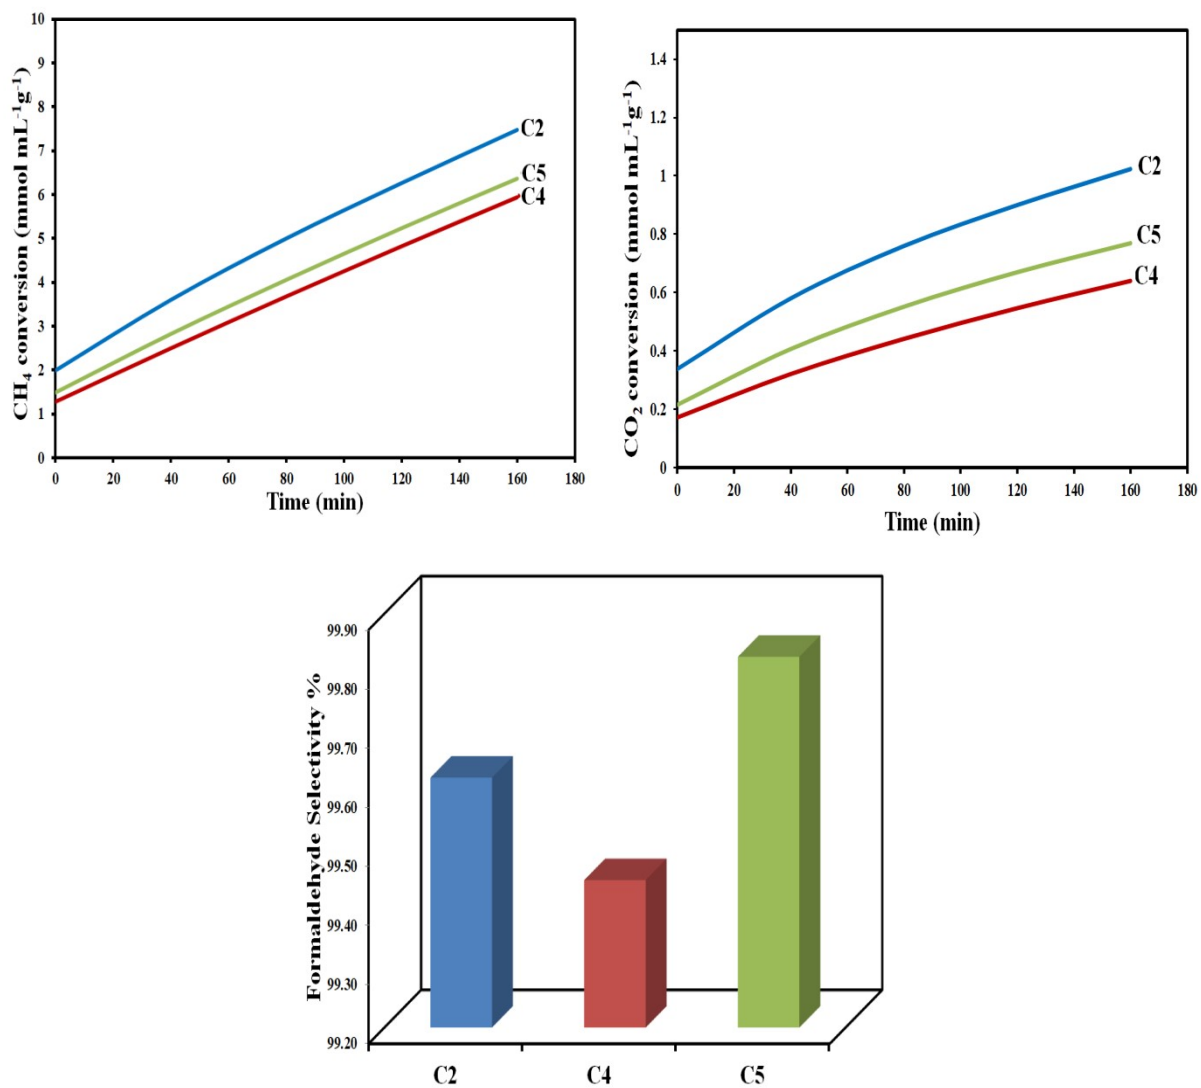

Fig. S17: Accumulative converted amount of CH<sub>4</sub> and CO<sub>2</sub> with time and corresponding formaldehyde selectivity % using the Cu-Al LDH catalysts prepared at different urea concentrations.

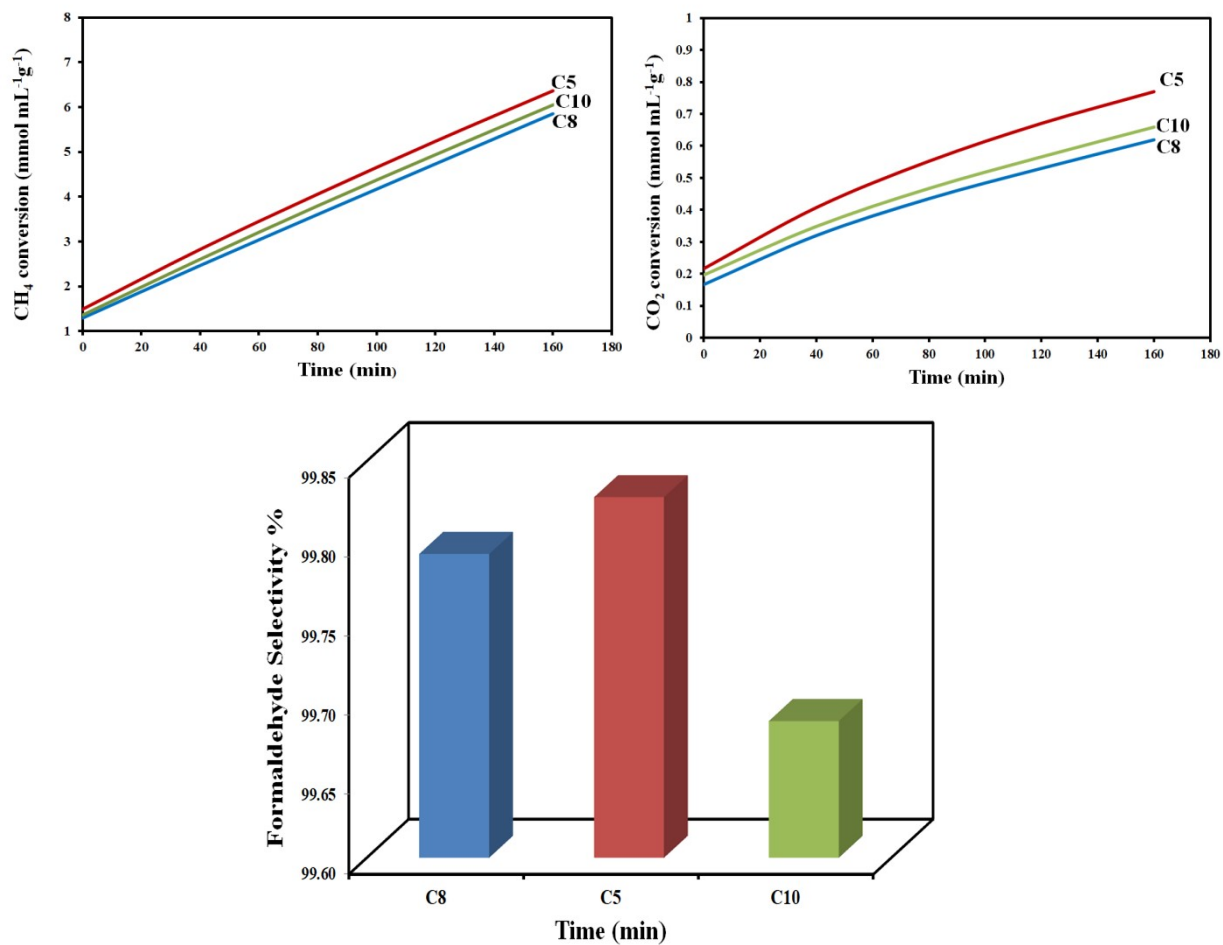

Fig. S18: Accumulative converted amount of CH<sub>4</sub> and CO<sub>2</sub> with time and corresponding formaldehyde selectivity % using the Cu-Al LDH catalysts prepared at different M<sup>II</sup>/M<sup>III</sup> ratios.



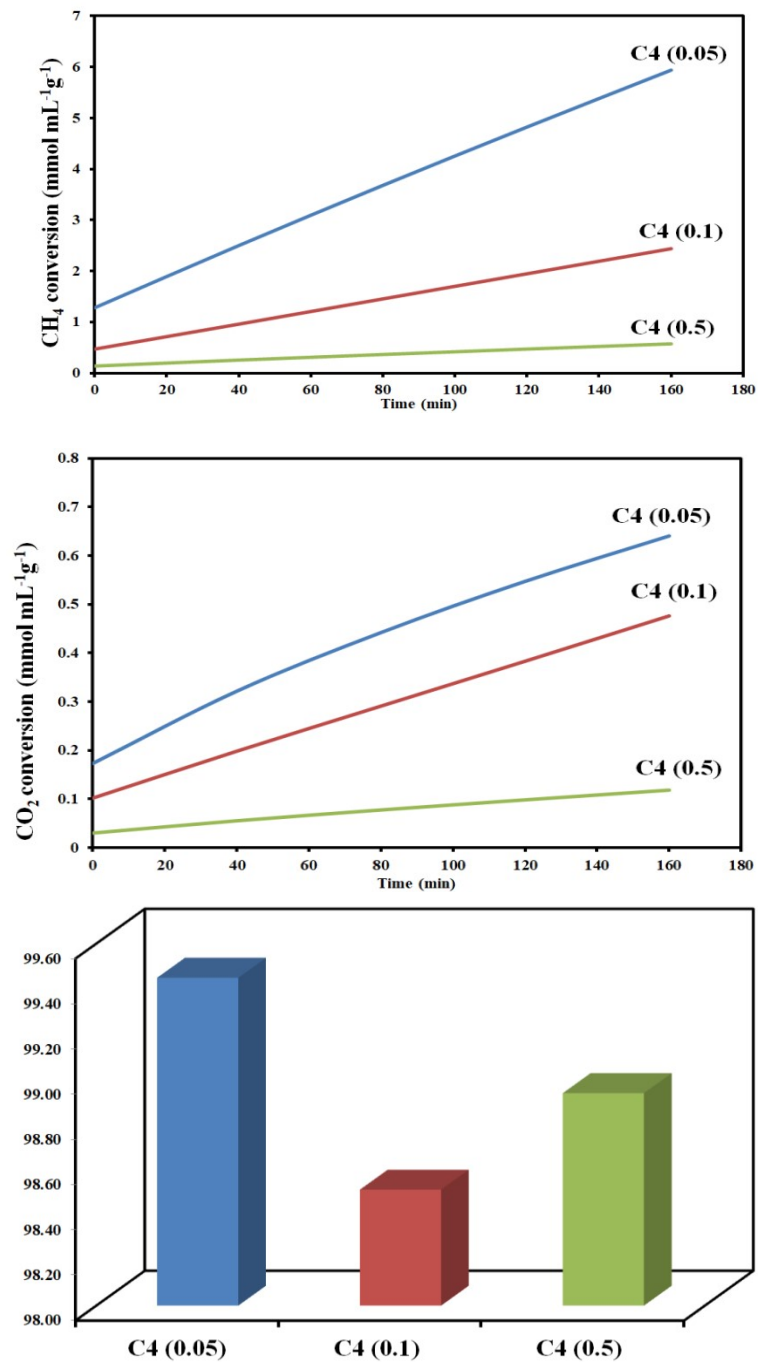

Fig. S19: Accumulative converted amount of CH<sub>4</sub> and CO<sub>2</sub> with time and corresponding formaldehyde selectivity % using different C4 doses.

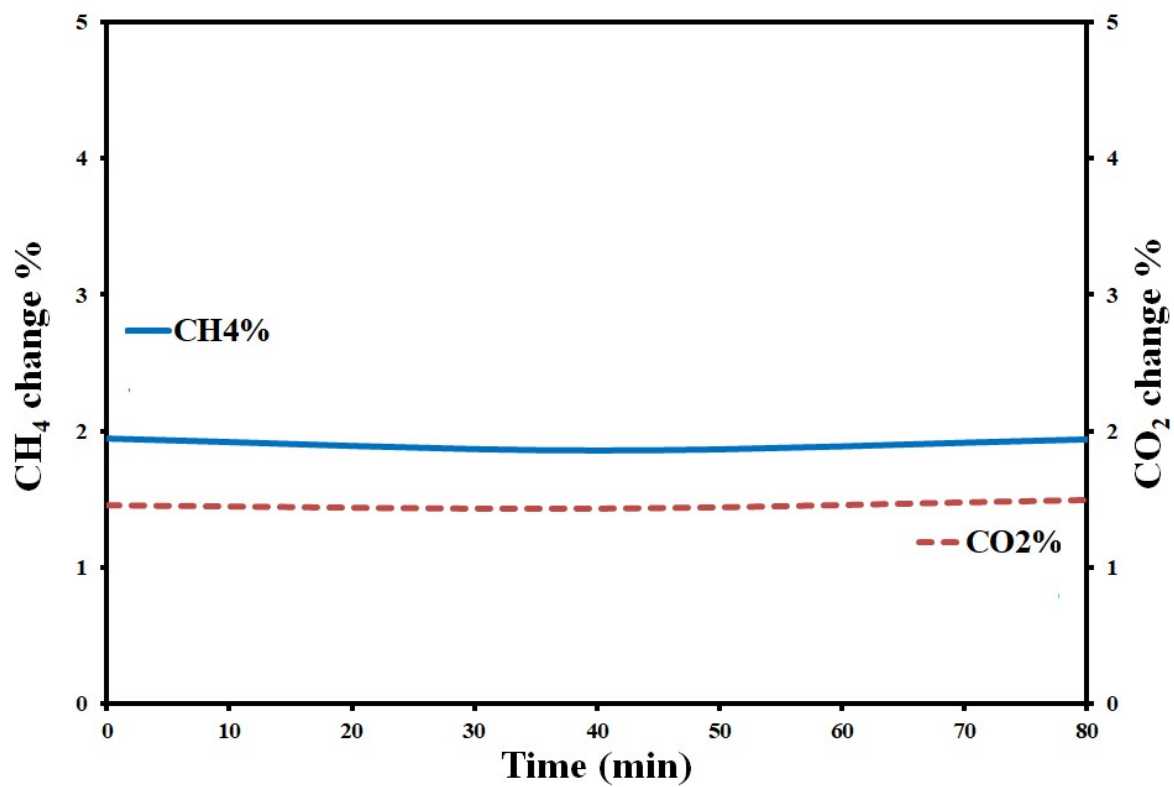

Fig. S20: Variation in both CH<sub>4</sub> and CO<sub>2</sub> percentage with time in light off experiment without catalyst.

## References

- 1 F. Zhao, L. Fan, K. Xu, D. Hua, G. Zhan and S. F. Zhou, *J. CO<sub>2</sub> Util.*, 2019, **33**, 222–232.
- 2 J. Li, S. Zhang, Y. Chen, T. Liu, C. Liu, X. Zhang, M. Yi, Z. Chu and X. Han, *RSC Adv.*, 2017, **7**, 29051–29057.
- 3 M. Abbasi, M. M. Sabzehmeidani, M. Ghaedi, R. Jannesar and A. Shokrollahi, *Mater. Sci. Eng. B Solid-State Mater. Adv. Technol.*, 2021, **267**, 115086.
- 4 M. Kiani, M. Bagherzadeh, A. M. Ghadiri, P. Makvandi and N. Rabiee, *Sci. Rep.*, 2022, **12**, 9461.
- 5 S. P. Adhikari, G. P. Awasthi, K.-S. Kim, C. H. Park and C. S. Kim, *Dalt. Trans.*, 2018, **47**, 4455–4466.
- 6 M. Ashrafizadeh, E. Nazarzadeh Zare, F. Rossi, N. Rabiee, E. Sharifi and P. Makvandi, *Chem. Eng. J.*, 2022, **448**, 137747.
- 7 N. Fu, S. Zhang, Y. Ma, Z. Yang and W. Liu, *RSC Adv.*, 2020, **10**, 9808–9813.
- 8 P. A. Kumar, P. V. Suneesh, B. K. G. Nair and T. G. S. Babu, *Electrochim. Acta*, 2021, **395**, 139145.
- 9 F. Zhao, G. Zhan and S. F. Zhou, *Nanoscale*, 2020, **12**, 13145–13156.
- 10 G. Jiang, M. Peng, L. Hu, J. Ouyang, X. Lv, Z. Yang, X. Liang, Y. Liu and H. Liu, *Chem. Eng. J.*, 2022, **435**, 134853.
- 11 X. Peng, M. Wang, F. Hu, F. Qiu, T. Zhang, H. Dai and Z. Cao, *J. Environ. Manage.*, 2018, **220**, 173–182.
- 12 P. Benito, M. Herrero, F. M. Labajos and V. Rives, *Appl. Clay Sci.*, 2010, **48**, 218–227.
- 13 M. Baghbanzadeh, L. Carbone, P. D. Cozzoli and C. O. Kappe, *Angew. Chem. Int. Ed.*, 2011, **50**, 11312–11359.
- 14 M. V. Sivaiah, S. Petit, J. Brendl?? and P. Patrier, *Appl. Clay Sci.*, 2010, **48**, 138–145.

- 15 Y. Fernández, J. A. Menéndez, A. Arenillas, E. Fuente, J. H. Peng, Z. B. Zhang, W. Li and Z. Y. Zhang, *Solid State Ionics*, 2009, **180**, 1372–1378.
- 16 S. C. Zhang and X. G. Li, *Colloids Surfaces A Physicochem. Eng. Asp.*, 2003, **226**, 35–44.
- 17 C. Feng, Q. Wei, S. Wang, B. Shi and H. Tang, *Colloids Surfaces A Physicochem. Eng. Asp.*, 2007, **303**, 241–248.
- 18 R. J. M. J. Vogels, J. T. Kloprogge and J. W. Geus, *J. Colloid Interface Sci.*, 2005, **285**, 86–93.
- 19 A. Naghash, T. H. Etsell and B. Lu, *J. Mater. Chem.*, 2008, **18**, 2562–2568.
- 20 A. A.-E. Sakr, T. Zaki, O. Saber, S. A. Hassan, A. K. Aboul-Gheit and S. Faramawy, *J. Taiwan Inst. Chem. Eng.*, 2013, **44**, 957–962.
- 21 S. Nayak and K. M. Parida, *ACS Omega*, 2018, **3**, 7324–7343.
- 22 K. Parida, L. Mohapatra and N. Baliarsingh, *J. Phys. Chem. C*, 2012, **116**, 22417–22424.
- 23 G. D. Gesesse, A. Gomis-berenguer, M. Barthe and C. O. Ania, *J. Photochem. Photobiol. A Chem.*, 2020, **398**, 112622.
